# Supplementary material for: Optical properties of armchair graphene nanoribbons with Stone–Wales defects and hydrogenation on the defects
Source: Royal Society of Chemistry journal article supplement (doi:10.1039/c5ra08836d), 2015-01-01
Supplement: c5ra08836d1.pdf [file c5ra08836d1.pdf]

## Supplementary Information

### **Optical properties of armchair graphene nanoribbons with Stone-Wales defects and the hydrogenation on the defects**

Min Wang,<sup>\*ab</sup> Yu Chen Wang,<sup>ab</sup> Hai Xing Zhao,<sup>ab</sup> Si Xing Song<sup>ab</sup>

<sup>a</sup>Institute for Clean Energy & Advanced Materials, Faculty of Materials and Energy, Southwest University, Chongqing 400715, P. R. China. Email: minwang@swu.edu.cn.

<sup>b</sup>Chongqing Key Laboratory for Advanced Materials and Technologies of Clean Energies, Chongqing 400715, P. R. China.

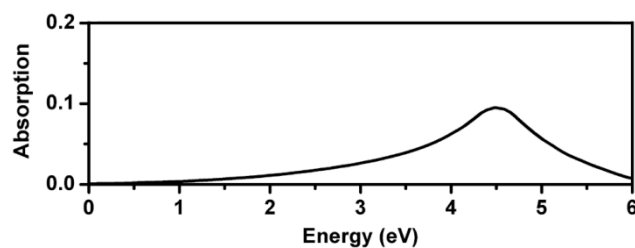

Fig. S1 Optical absorption spectrum of graphene.

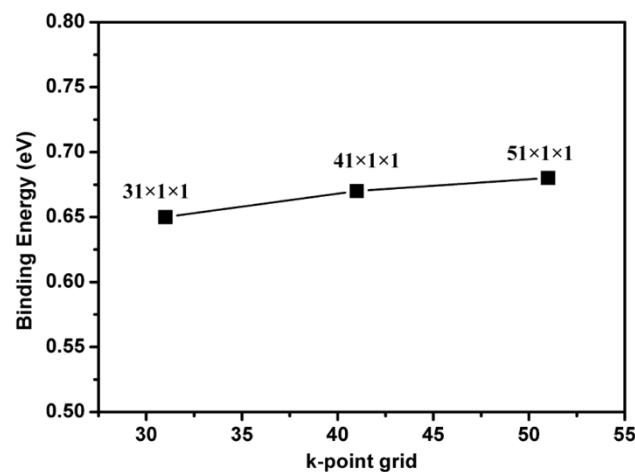

Fig. S2 The relation of binding energy and k-point grid in W9-SW.
